# Supplementary material for: Facet engineering of LaNbON2 transformed from LaKNaNbO5 for enhanced photocatalytic O2 evolution
Source: Royal Society of Chemistry journal article supplement (doi:10.1039/d0ta01489c), 2020-01-01
Supplement: d0ta01489c1.pdf [file d0ta01489c1.pdf]

## Supporting Information

# Facet Engineering of LaNbON<sub>2</sub> Transformed from LaKNaNbO<sub>5</sub> for Enhanced Photocatalytic O<sub>2</sub> Evolution

*Xin Wang,<sup>ab</sup> Takashi Hisatomi,<sup>b</sup> Junwu Liang,<sup>c</sup> Zheng Wang,<sup>b</sup> Yuanjiang Xiang,<sup>\*d</sup> Yihua Zhao,<sup>e</sup>  
Xiaoyu Dai,<sup>a</sup> Tsuyoshi Takata,<sup>b</sup> and Kazunari Domen<sup>\*bf</sup>*

<sup>a</sup> Institute of Microscale Optoelectronics (IMO), Shenzhen University, Shenzhen, 518060, China

<sup>b</sup> Research Initiative for Supra-Materials (RISM), Shinshu University 4-17-1 Wakasato, Nagano,  
380-8553, Japan

<sup>c</sup> School of Physics and Telecommunication Engineering, Yulin Normal University, Yulin,  
537000, China

<sup>d</sup> School of Physics and Electronics, Hunan University, Changsha 410082, China

<sup>e</sup> College of Physics and Optoelectronic Engineering, Shenzhen University, Shenzhen, 518060,  
China

<sup>f</sup> Office of University professors, The University of Tokyo, 7-3-1 Hongo, Bunkyo-ku, Tokyo 113-  
8656, Japan

\*E-mail: domen@shinshu-u.ac.jp

## Results and Discussion

## Crystal structure

Layered  $\text{LaKNaNbO}_5$  possesses a tetragonal structure with the space group  $P4/nmm$  and the corresponding unit cell parameters are  $a=5.81350$ ,  $b=5.81350$  and  $c=8.28040$  Å. The perovskitetype  $\text{LaNbON}_2$  possesses an orthorhombic structure with space group  $Pnma$  and the corresponding unit cell parameters are  $a=5.72210$ ,  $b=8.06840$  and  $c=5.74280$  Å.<sup>1</sup> Notably, the atomic arrangement of La and Nb ions in  $\text{LaKNaNbO}_5$  along the  $[001]$  direction is in very good agreement with that of  $\text{LaNbON}_2$  along the  $[010]$  direction. Therefore, the transformation of  $\text{LaKNaNbO}_5$  to  $\text{LaNbON}_2$  is viable.

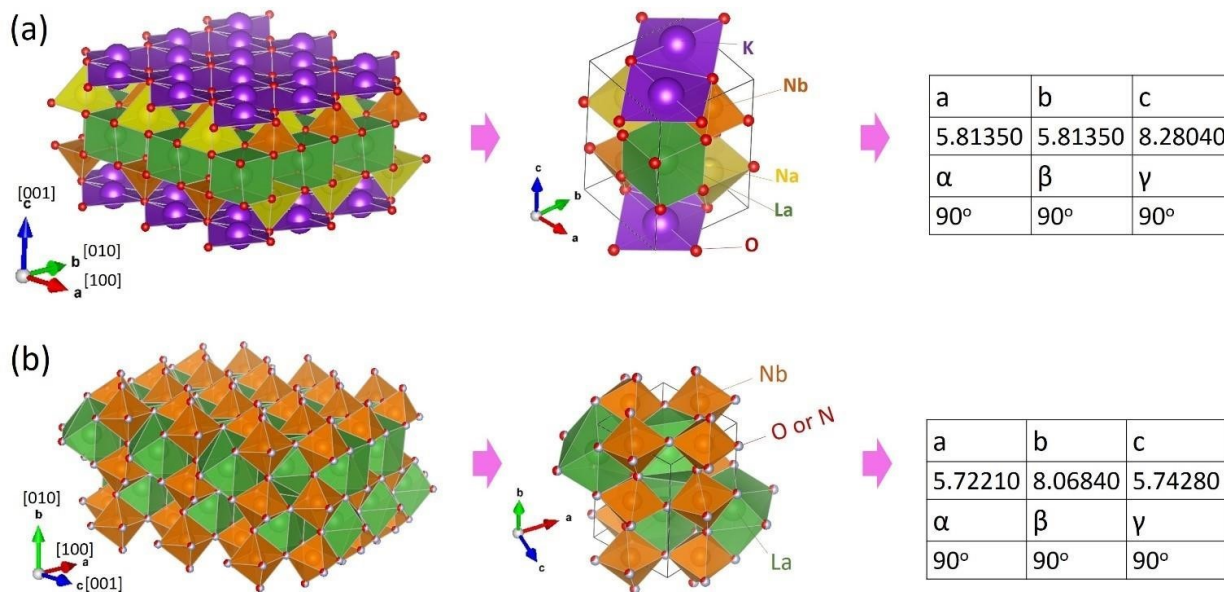

Fig. S1 Crystal structures and unit cell parameters of (a)  $\text{LaKNaNbO}_5$  and (b)  $\text{LaNbON}_2$ .

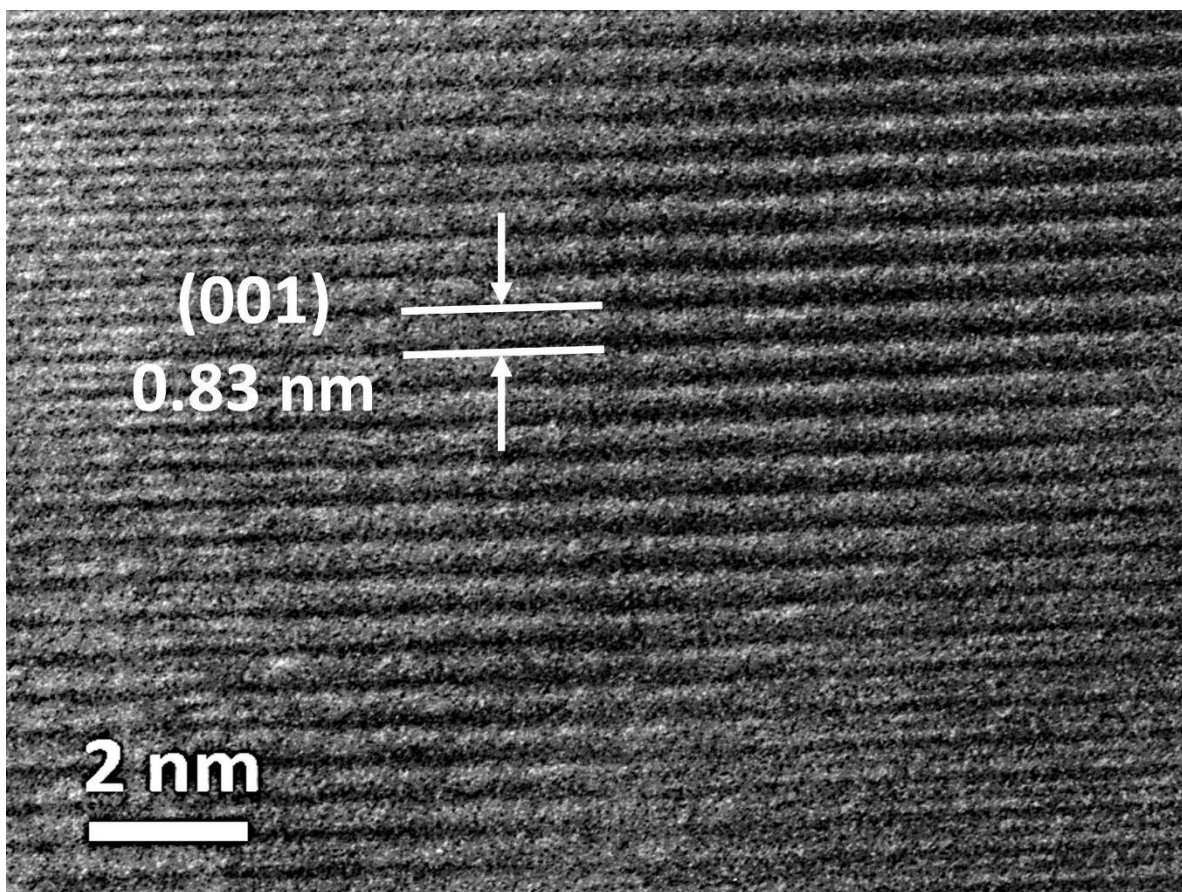

Fig. S2 HRTEM image of the plate-like LaKNbO<sub>5</sub> at a lateral face.

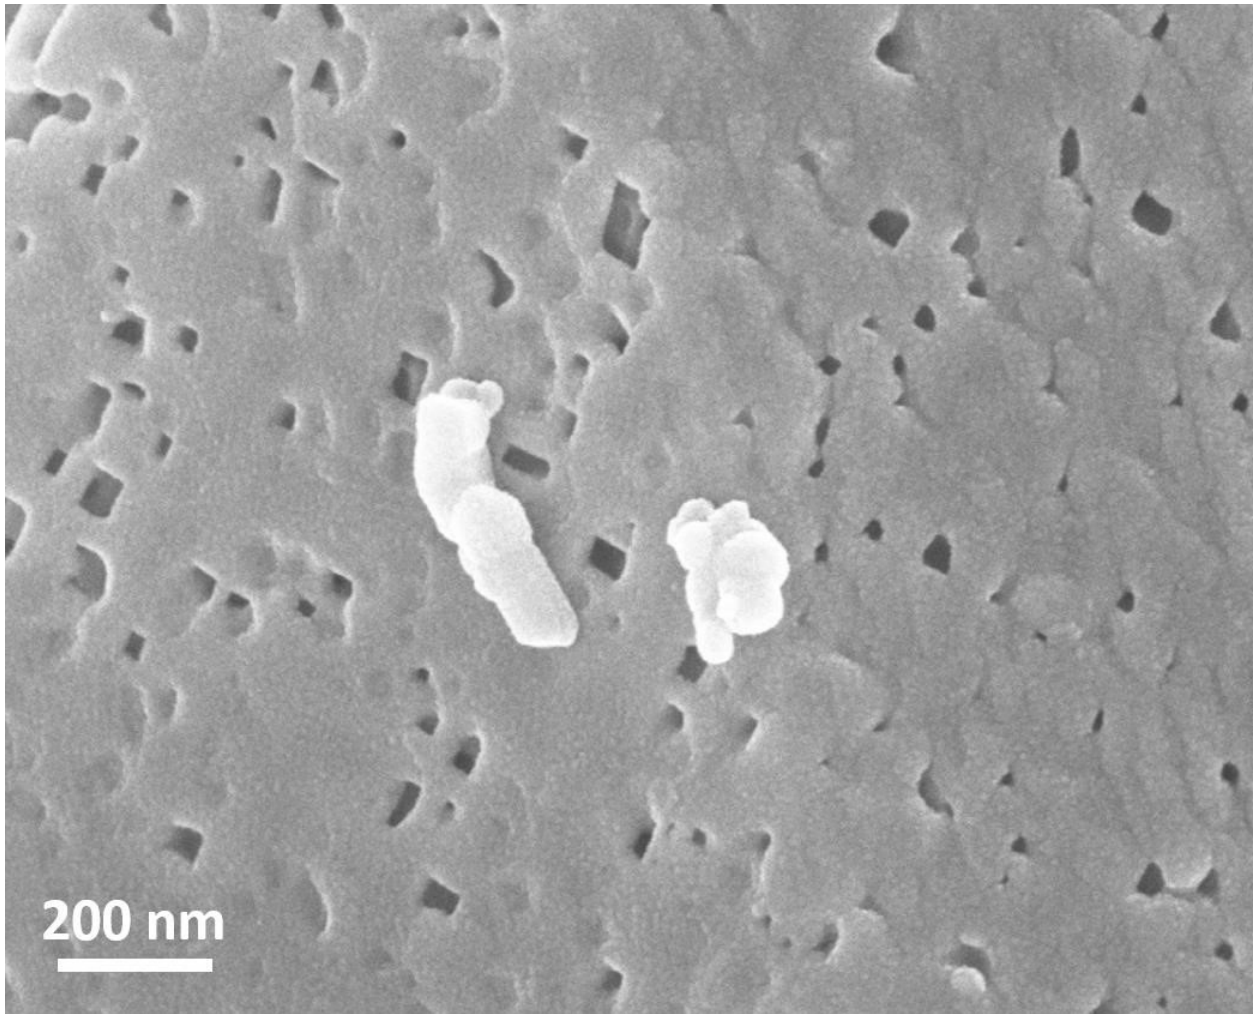

Fig. S3 SEM image of plate-like  $\text{LaKNaNbO}_5$  nitrided at 1223 K for 4 h.

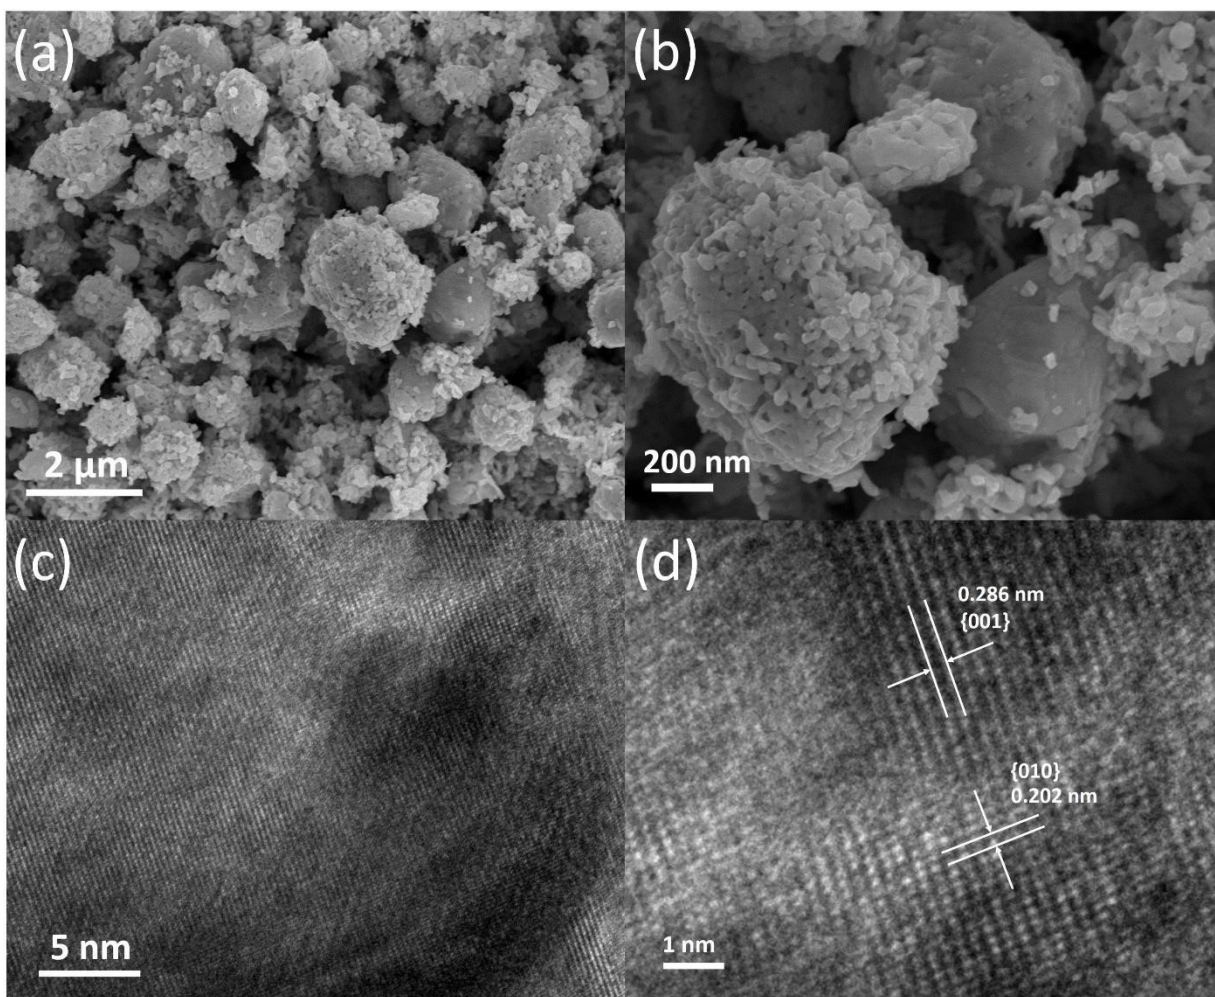

Fig. S4 (a,b) SEM image and (c,d) HRTEM image of conventional  $\text{LaNbON}_2$  powder prepared by nitriding  $\text{LaNbO}_4$ .

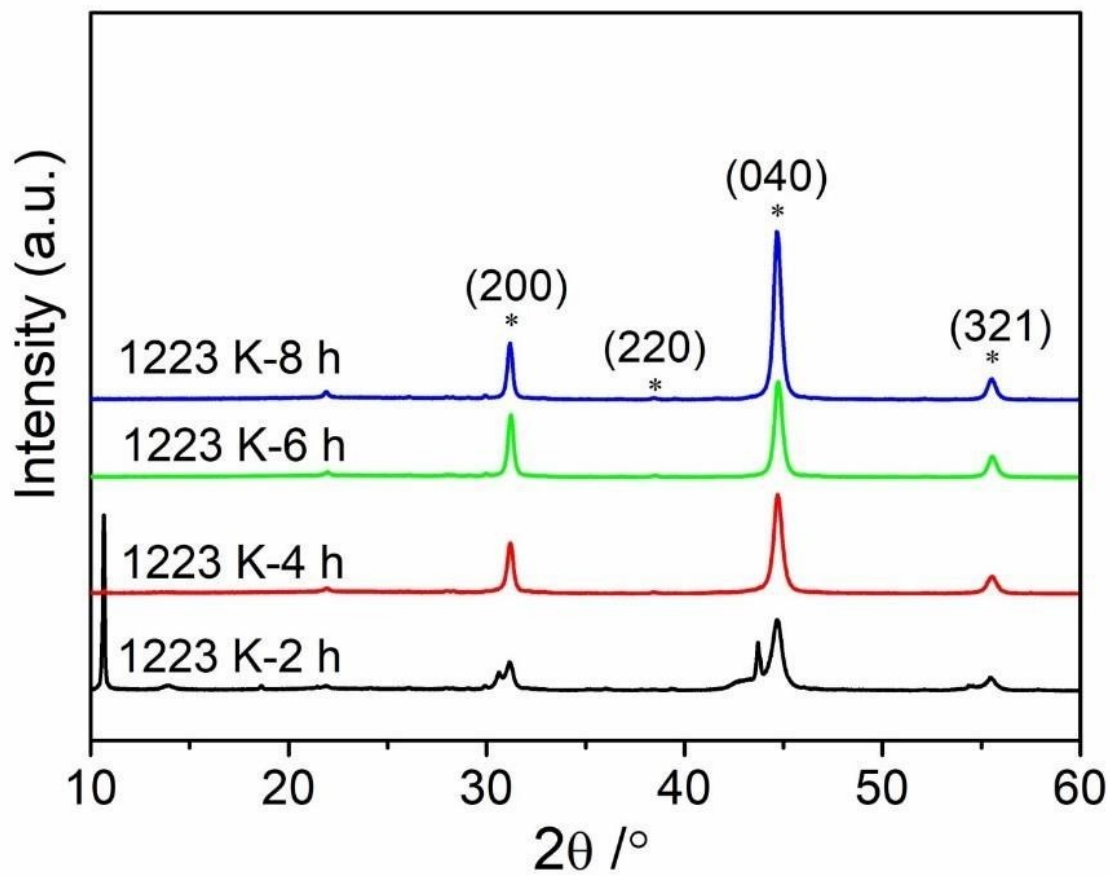

Fig. S5 XRD patterns obtained from LaKNaNbO<sub>5</sub> nitrided at 1223 for 2-8 h.

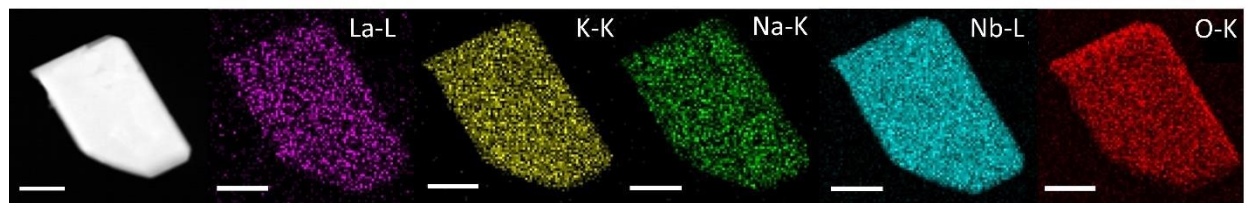

Fig. S6. EDS elemental maps of LaKNaNbO<sub>5</sub> precursor, the corresponding atomic ratios were about La/Nb=1.2; K/Nb=1.4; Na/Nb=0.9; O/Nb=6.5. Scale bars indicate 1 μm.

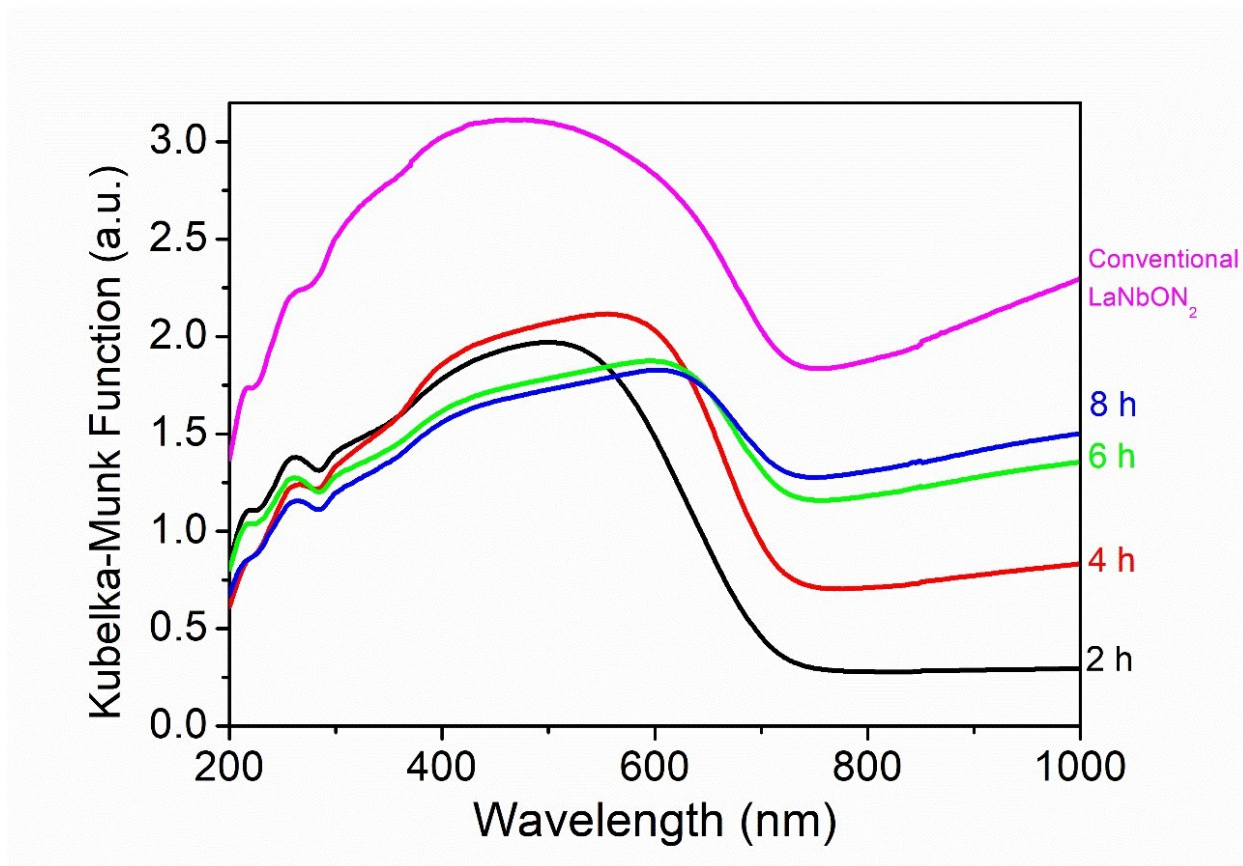

Fig. S7 UV-vis DRS data for LaKNaNbO<sub>5</sub> nitrided at 1223 K for 2–8 h and for conventional LaNbON<sub>2</sub> prepared from LaNbO<sub>4</sub>.



Table S1. Fractions of surface Nb species for LaKNaNbO<sub>5</sub>, LaKNaNbO<sub>5</sub> nitrated at 1223 K for 4 h, and conventional LaNbON<sub>2</sub> obtained from LaNbO<sub>4</sub>, estimated based on the narrow-scan Nb 3d XPS spectra shown in Figure 2E.<sup>2-4</sup>

| Samples                                          | Fractions of surface Nb species       |                                       |                                       |                                                           |
|--------------------------------------------------|---------------------------------------|---------------------------------------|---------------------------------------|-----------------------------------------------------------|
|                                                  | Nb <sub>5+</sub> /Nb <sub>total</sub> | Nb <sub>4+</sub> /Nb <sub>total</sub> | Nb <sub>3+</sub> /Nb <sub>total</sub> | (Nb <sup>4+</sup> +Nb <sup>3+</sup> )/Nb <sub>total</sub> |
| LaKNaNbO <sub>5</sub>                            | 1.00                                  | 0.00                                  | 0.00                                  | 0.00                                                      |
| LaKNaNbO <sub>5</sub> nitrated at 1223 K for 4 h | 0.28                                  | 0.61                                  | 0.11                                  | 0.72                                                      |
| The conventional LaNbON <sub>2</sub>             | 0.14                                  | 0.45                                  | 0.41                                  | 0.86                                                      |

Table S2. Effective electron ( $m_e^*$ ) and hole ( $m_h^*$ ) masses along the [100], [010] and [001] directions, where  $m_0$  is the free electron mass.

| Direction                       | $m_e^*/m_0$ | $m_h^*/m_0$ |
|---------------------------------|-------------|-------------|
| [100]( $\Gamma \rightarrow Y$ ) | 1.682       | 0.835       |
| [010]( $\Gamma \rightarrow X$ ) | 0.838       | 10.238      |
| [001]( $\Gamma \rightarrow Z$ ) | 1.642       | 0.947       |

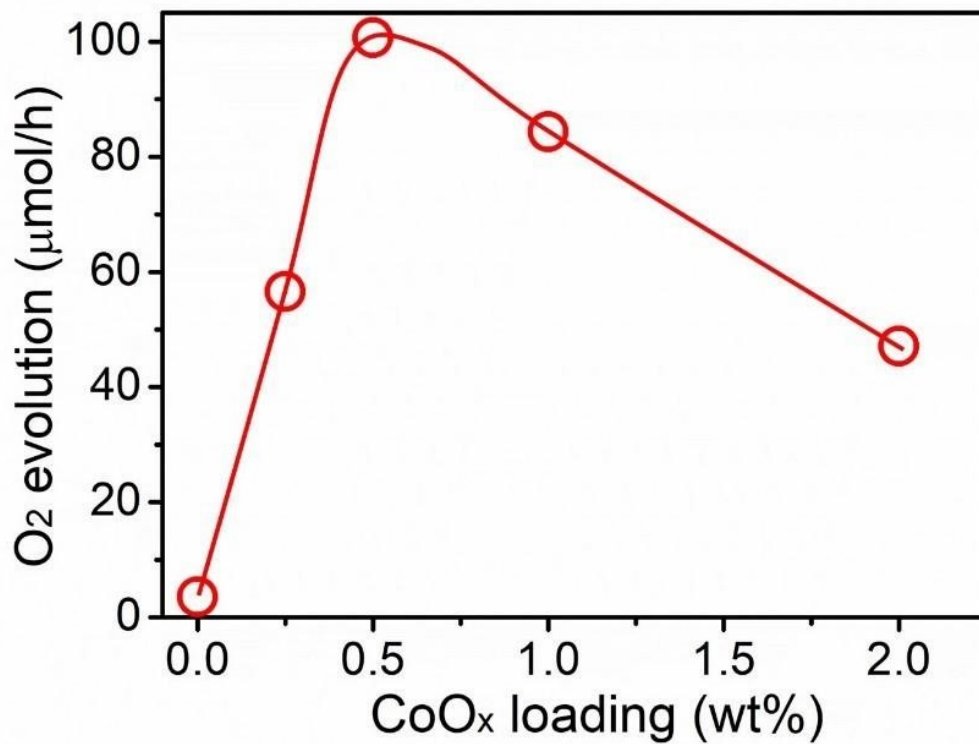

Fig. S8 The effect of the CoO<sub>x</sub> loading amount on photocatalytic O<sub>2</sub> evolution activity using LaKNaNbO<sub>5</sub> nitrated at 1223 K for 4 h. Reaction conditions: in 150 mL of an aqueous 50 mM AgNO<sub>3</sub> solution containing 0.20 g of La<sub>2</sub>O<sub>3</sub>, photocatalyst: 300 mg, light source: 300 W xenon lamp ( $\lambda \geq 420$  nm), reaction cell: top-irradiation cell with a Pyrex window.

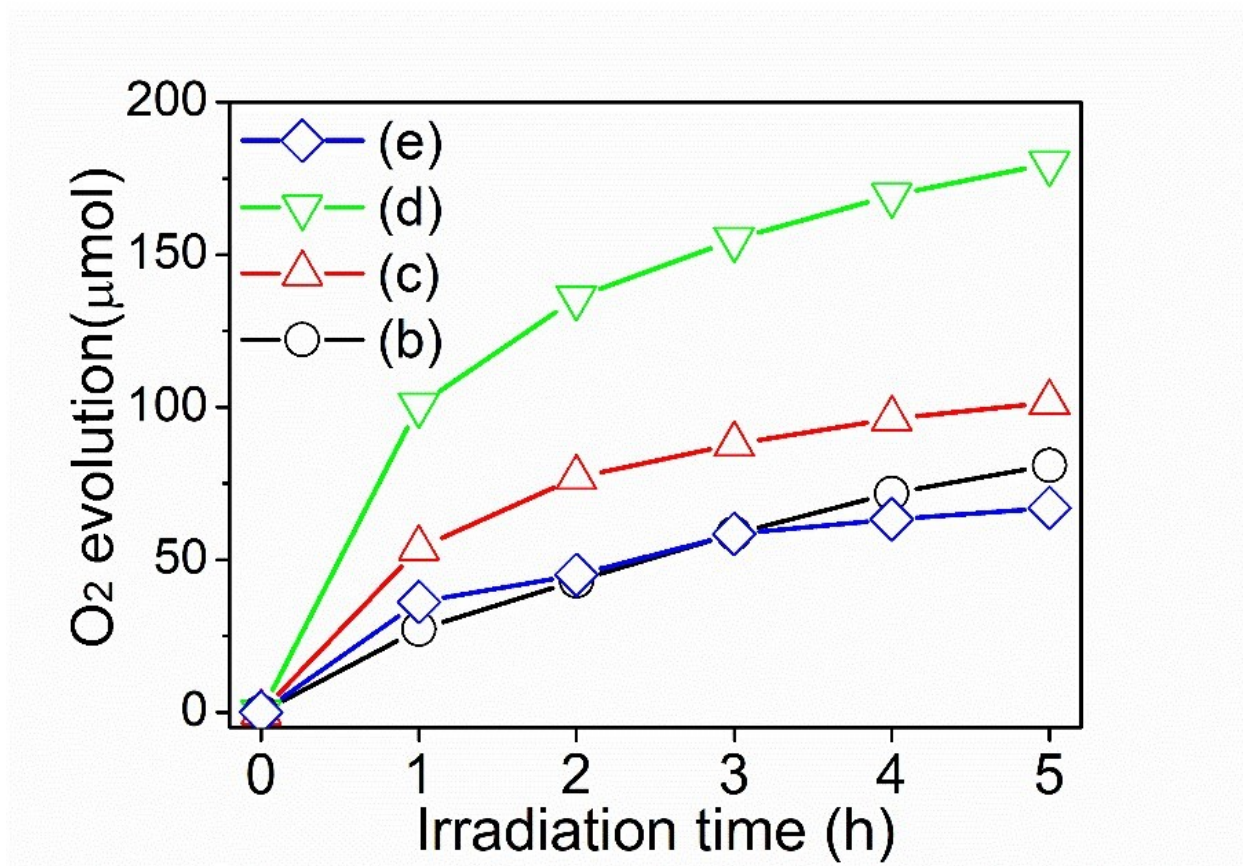

Fig. S9 Time courses of photocatalytic O<sub>2</sub> evolution over LaKNaNbO<sub>5</sub> nitrided at (b) 1123, (c) 1173, (d) 1223 and (e) 1273 K for 4 h. Reaction conditions: in 150 mL of an aqueous 50 mM AgNO<sub>3</sub> solution containing 0.20 g of La<sub>2</sub>O<sub>3</sub>, photocatalyst: 300 mg, co-catalyst: 0.5 wt% CoO<sub>x</sub>, light source: 300 W xenon lamp ( $\lambda \geq 420$  nm), reaction cell: top-irradiation cell with a Pyrex window.

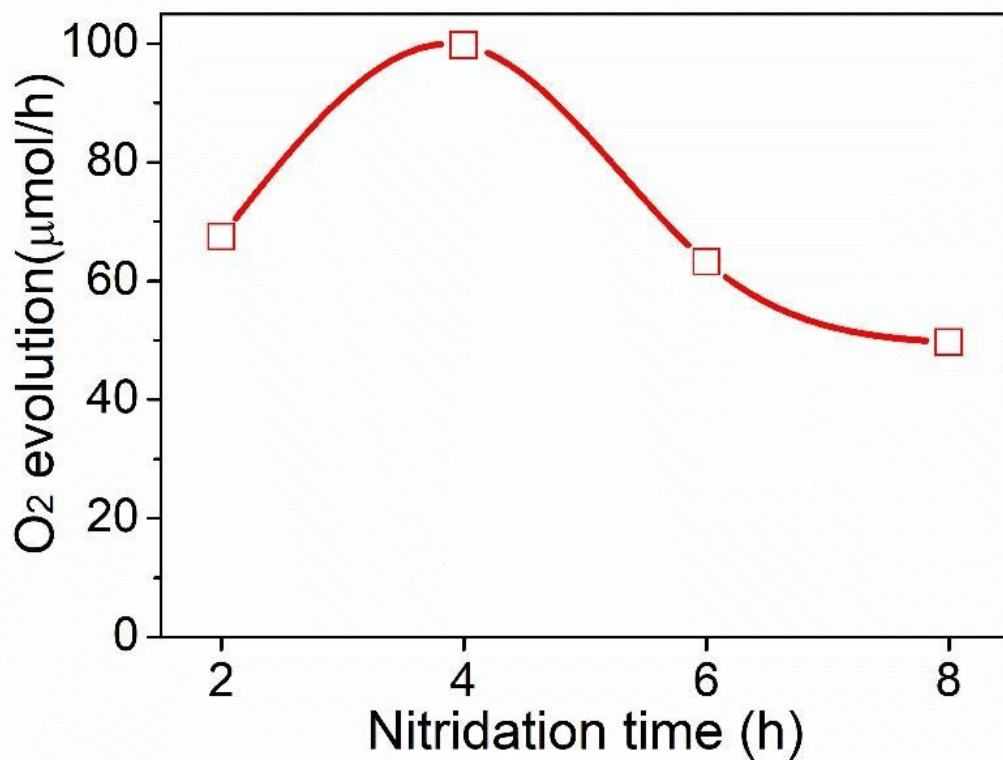

Fig. S10 Photocatalytic O<sub>2</sub> evolution rates for LaKNaNbO<sub>5</sub> nitrided at 1223 K for 2-8 h. Reaction conditions: in 150 mL of an aqueous 50 mM AgNO<sub>3</sub> solution containing 0.20 g of La<sub>2</sub>O<sub>3</sub>, photocatalyst: 300 mg, co-catalyst: 0.5 wt% CoO<sub>x</sub>, light source: 300 W xenon lamp ( $\lambda \geq 420$  nm), reaction cell: top-irradiation cell with a Pyrex window.

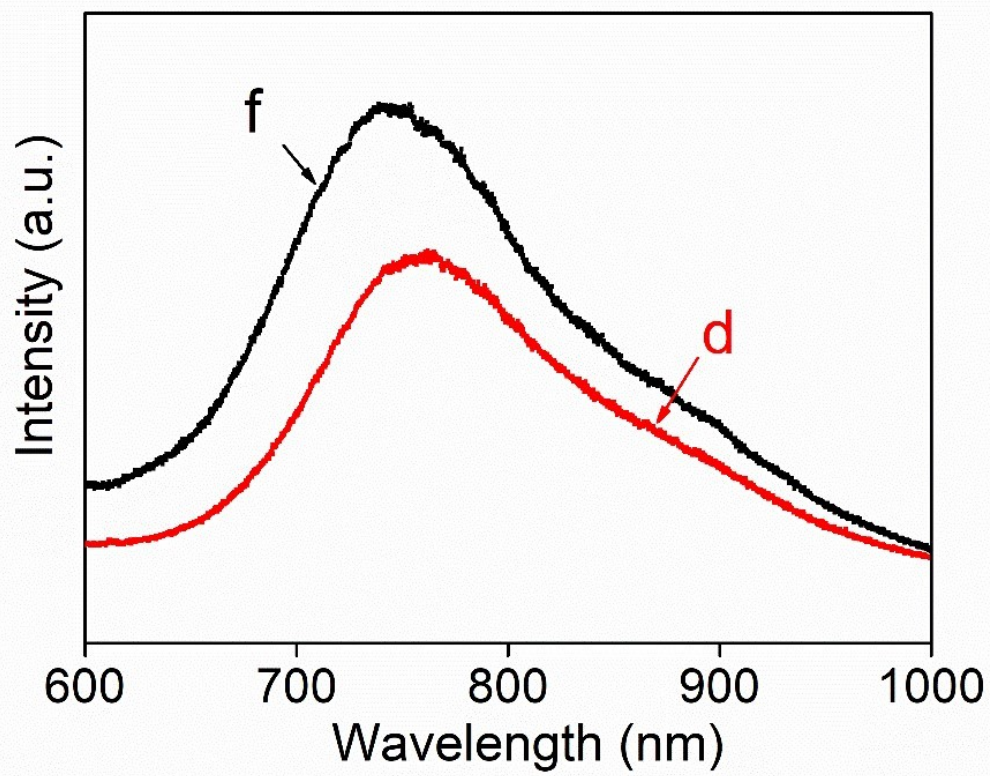

Fig. S11 Photoluminescence spectra of (d)  $\text{LaKNaNbO}_5$  nitrided at 1223 K for 4 h and (f) conventional  $\text{LaNbON}_2$  prepared from  $\text{LaNbO}_4$ .

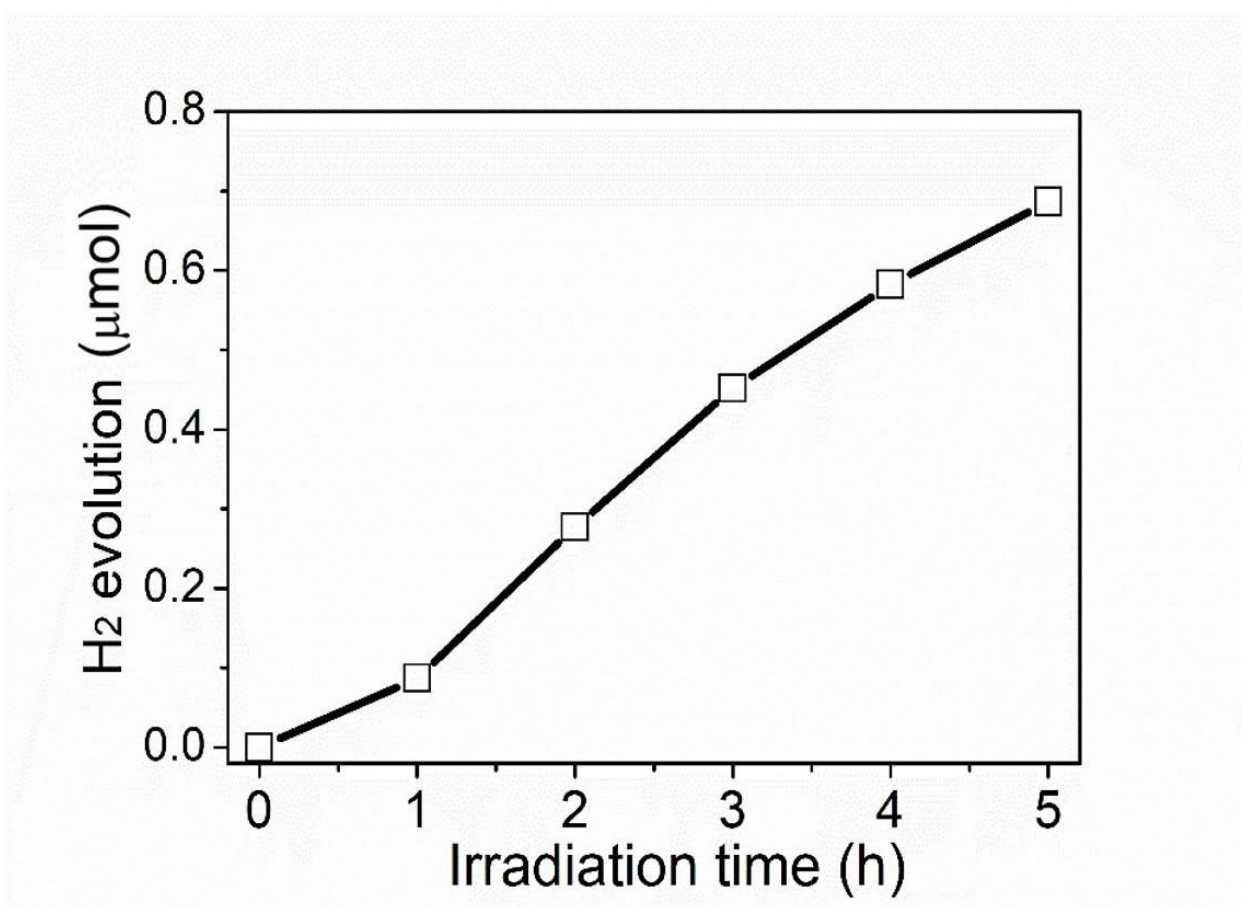

Fig. S12 Time courses of H<sub>2</sub> evolution over LaKNaNbO<sub>5</sub> nitrated at 1223 K for 4 h. Reaction conditions: in 150 mL aqueous methanol (20 vol%), photocatalyst: 300 mg, co-catalyst: 0.5 wt% Rh, loading method: impregnation with H<sub>2</sub> reduction, light source: 300 W xenon lamp ( $\lambda \geq 420$  nm), reaction cell: top-irradiation cell with a Pyrex window.

## References

1. K. Momma, F. Izumi, *J. Appl. Crystallogr.*, 2011, **44**, 1272.
2. J. Seo, M. Nakabayashi, T. Hisatomi, N. Shibata, T. Minegishi, M. Katayama, K. Domen, *J. Mater. Chem. A*, 2019, **7**, 493.
3. M. K. Bahl, *J. Phys. Chem. Solids*, 1975, **36**, 485.
4. J. Seo, T. Hisatomi, M. Nakabayashi, N. Shibata, T. Minegishi, M. Katayama, K. Domen, *Adv. Energy Mater.*, 2018, **8**, 1800094.
